# Supplementary material
Source: PubMed Central journal article supplement (PMC6155489)
Supplement: NIHMS79494-supplement-Fig__S1.pdf [file NIHMS79494-supplement-Fig__S1.pdf]

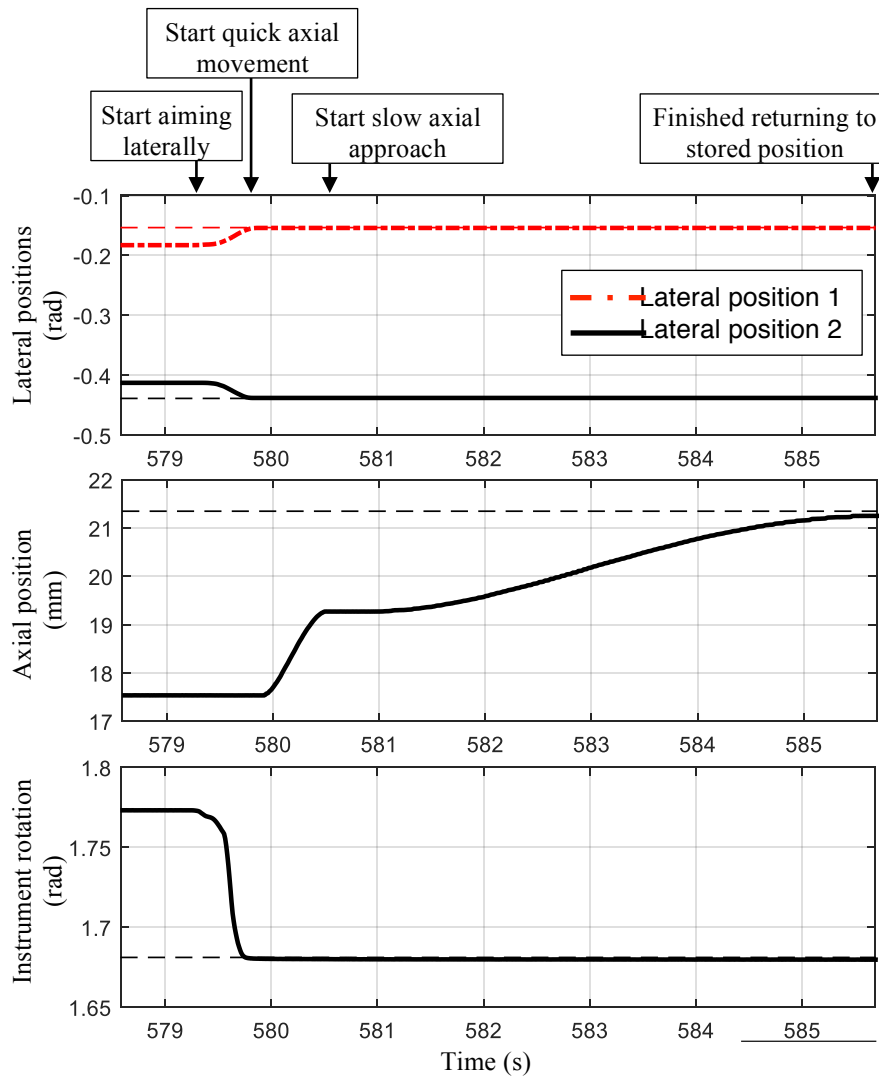

**Figure 4. Instrument movement during ‘return to stored position’.** Dashed lines denote previously stored positions.
