# Supplementary material
Source: PubMed Central journal article supplement (PMC6155489)

**A**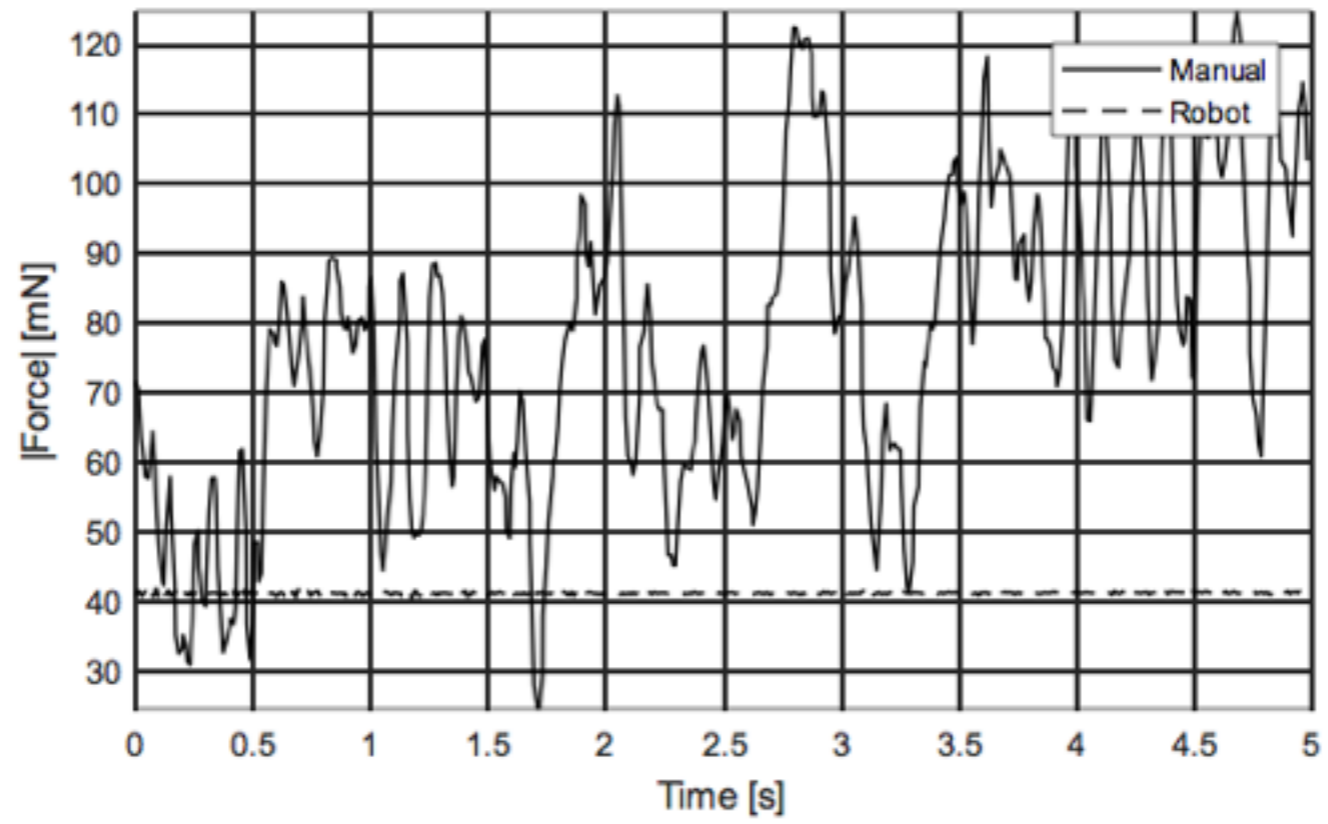**B**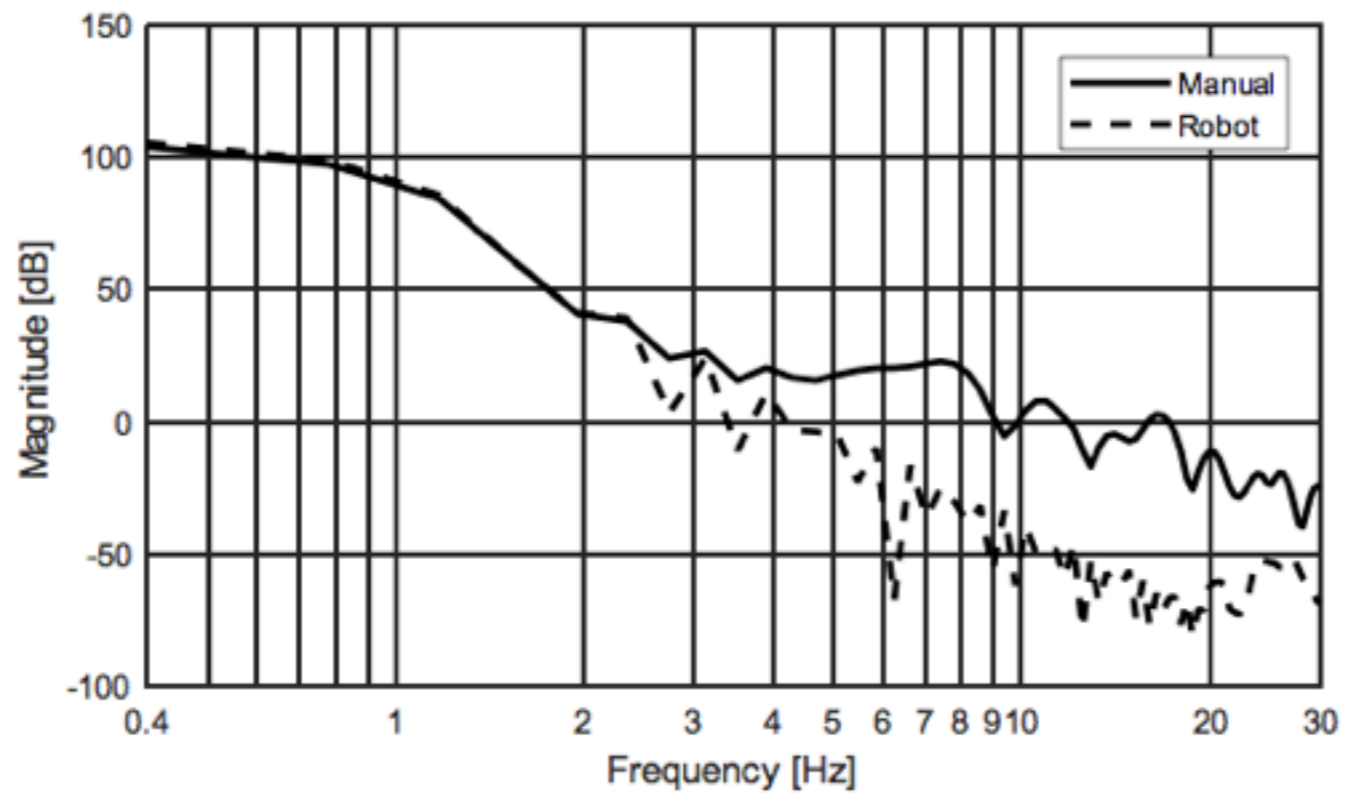

Supplement: NIHMS79494-supplement-Fig__S3.pdf [file NIHMS79494-supplement-Fig__S3.pdf]
